# Supplementary figures and images for: Adaptation to HIF1α Deletion in Hypoxic Cancer Cells by Upregulation of GLUT14 and Creatine Metabolism
Source: Oxford University Press journal article supplement (doi:10.1158/1541-7786.mcr-18-0315), 2019-03-18

Supplementary 3

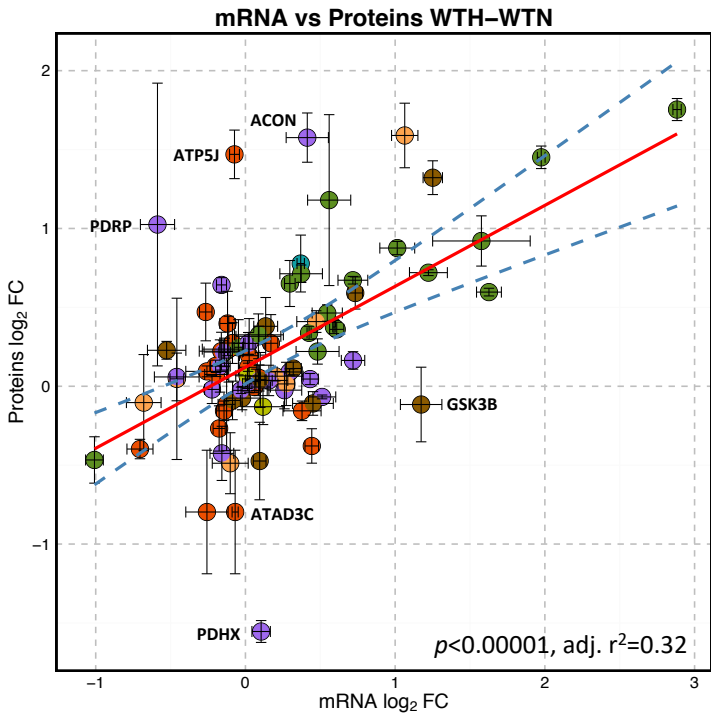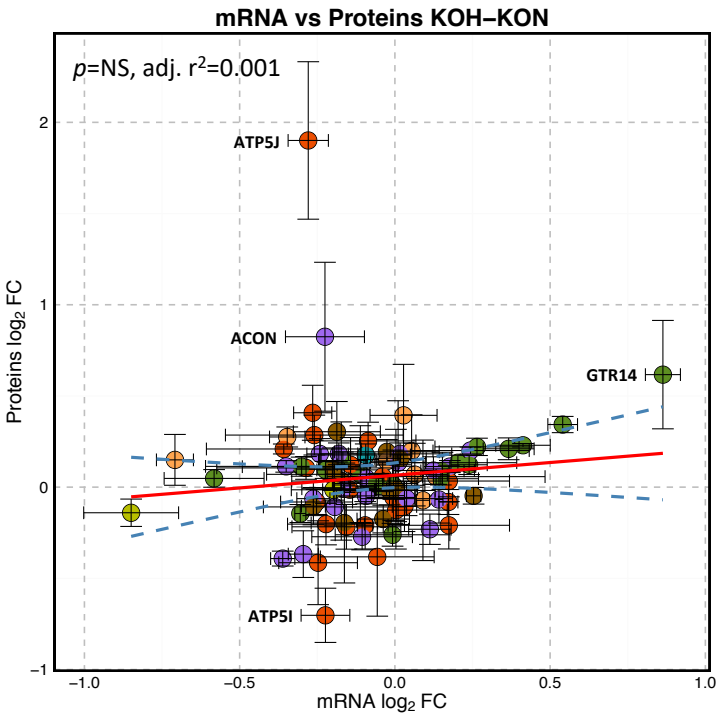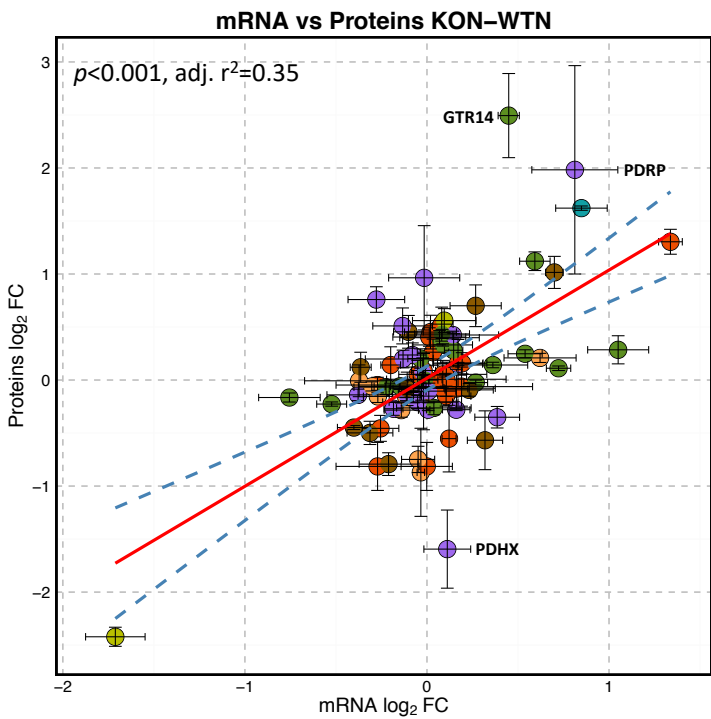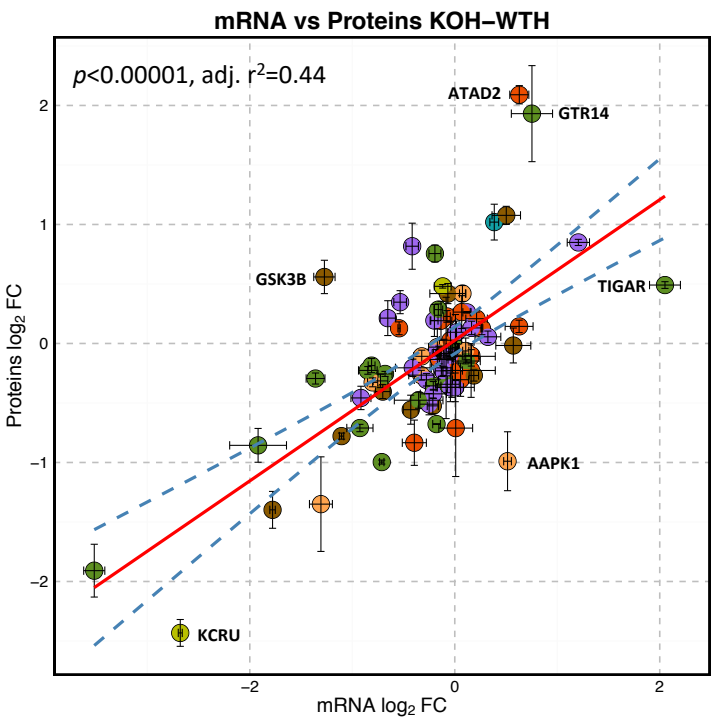

Metabolic pathway

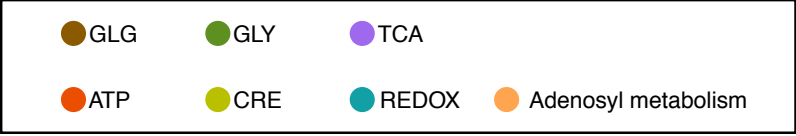

Supplement: 15417786mcr180315-sup-199432_2_supp_5374936_pnwnp4.pdf [file 15417786mcr180315-sup-199432_2_supp_5374936_pnwnp4.pdf]
